# Supplementary material
Source: publisher figshare collection journal article supplement (https://frontiersin.figshare.com/ndownloader/files/30949402)

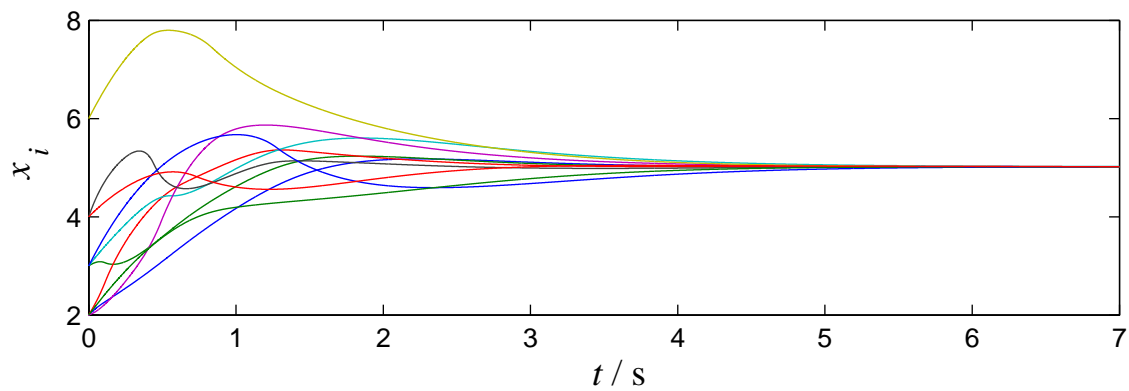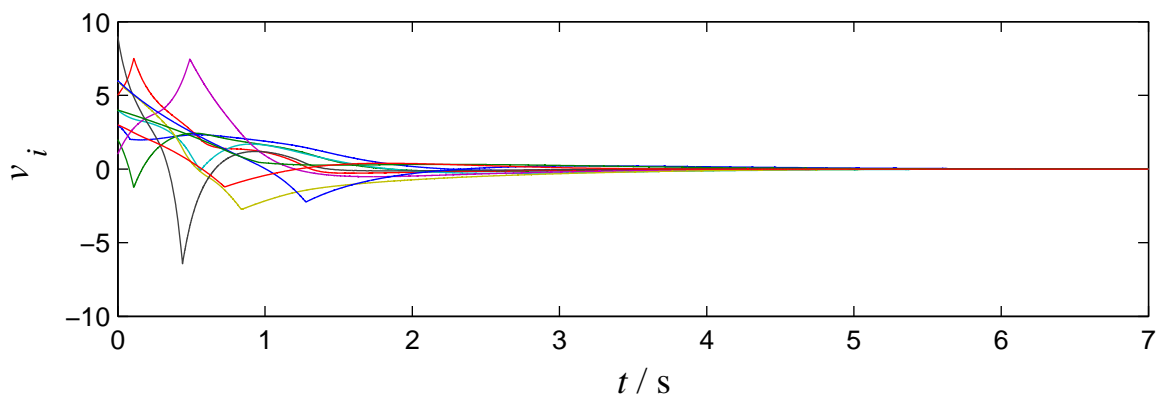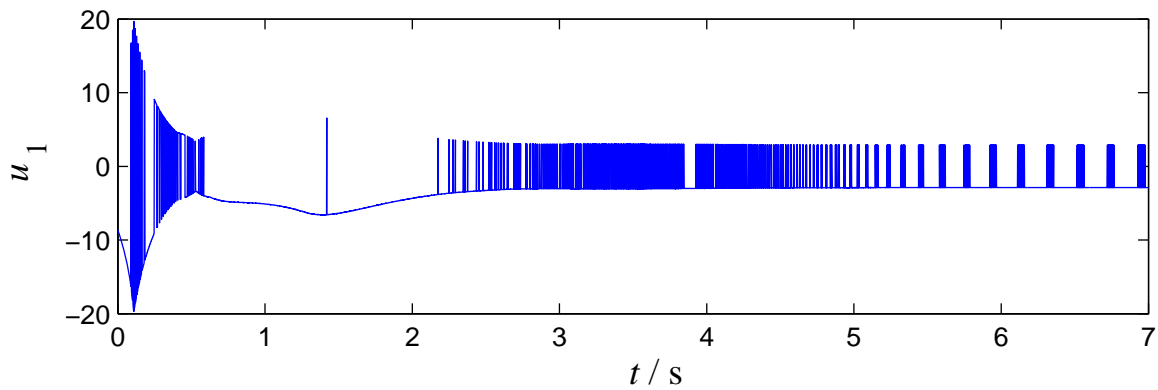

Supplement: Supplementary file 1 [file 30949402]
